# Supplementary material for: Revisiting Li3V2(PO4)3as an anode – an outstanding negative electrode for high power energy storage devices
Source: Royal Society of Chemistry journal article supplement (doi:10.1039/c4ta03845b), 2014-01-01
Supplement: c4ta03845b1.pdf [file c4ta03845b1.pdf]

## Supporting Information

### Revisiting $\text{Li}_3\text{V}_2(\text{PO}_4)_3$ as Anode – An Outstanding Negative Electrode for High Power Energy Storage Devices

*Xiaofei Zhang, Ruben-Simon Kühnel, Matthias Schroeder and Andrea Balducci\**

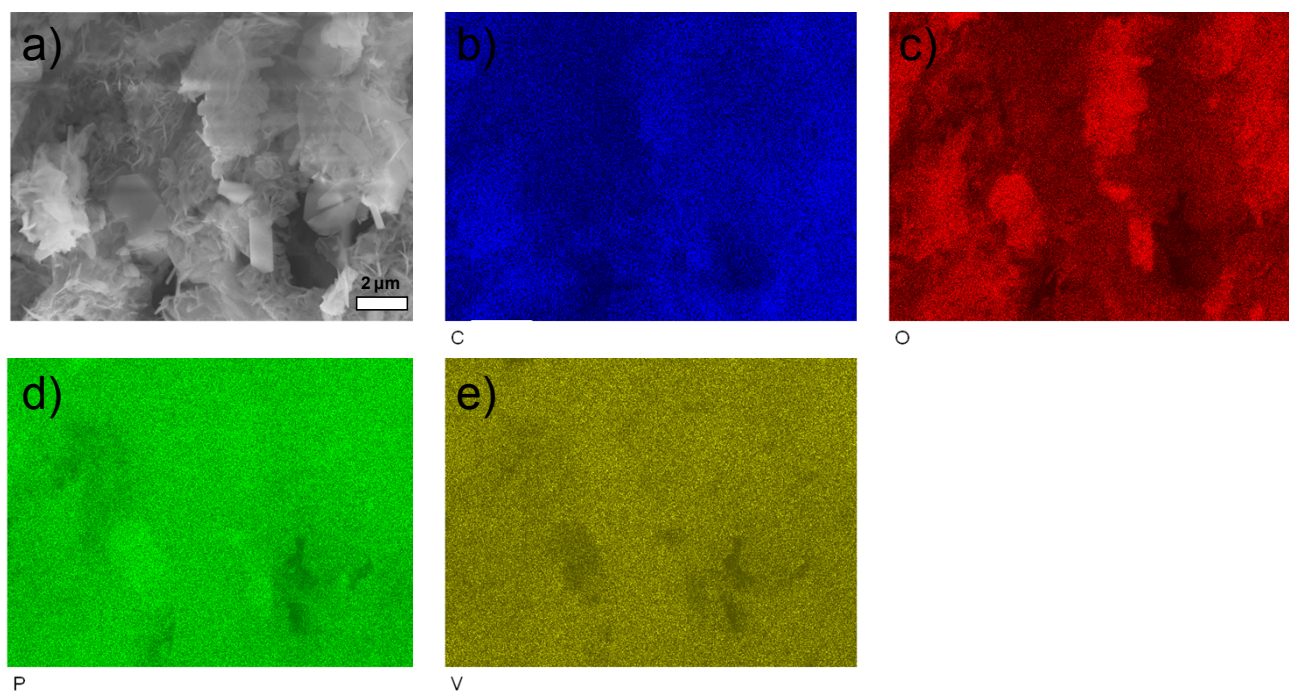

**Fig. S1** a) SEM image of the investigated LVP material and b), c), d) and e) corresponding elemental mapping of carbon, oxygen, phosphorus and vanadium, respectively.

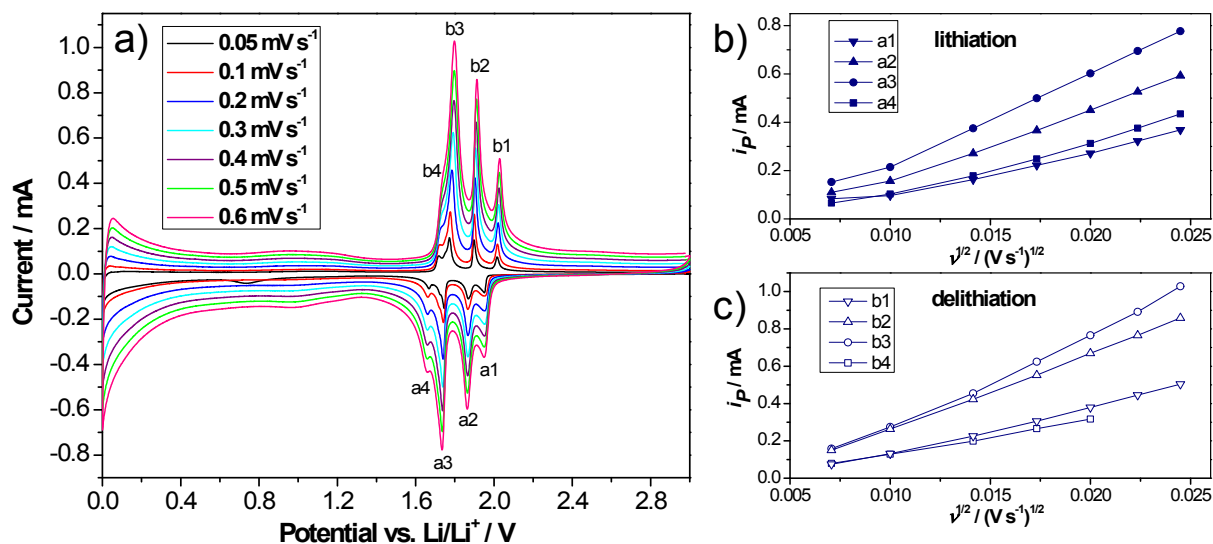

**Fig. S2** a) Cyclic voltammograms and b), c) maximum peak current vs. the square root of the scan rate for the LVP electrodes in the potential range 3.0 to 0.0 V vs. Li/Li<sup>+</sup> during b) lithiation and c) delithiation.

Apparent lithium diffusion coefficients  $D$  were calculated from the peak currents with the Randles-Cevcik equation:<sup>33-36</sup>

$$i_p = 2.69 \cdot 10^5 C \cdot \text{mol}^{-1} \cdot V^{-1/2} n^{3/2} A \cdot D^{1/2} \nu^{1/2} C_0^* \quad (2)$$

Here,  $i_p$  is the measured peak current,  $n$  is the number of electrons involved in each lithiation/delithiation process (0.5),  $A$  is the electroactive area (as approximation, the geometric surface area of the electrodes of 1.13 cm<sup>2</sup> was taken),  $\nu$  is the potential sweep rate and  $C_0^*$  is the lithium concentration in the LVP material (e.g., 0.024 mol cm<sup>3</sup> at peak a1, calculated from the unit cell volume). The diffusion coefficients were obtained from the slopes of the linear curves in  $i_p$  vs.  $\nu^{1/2}$  plots by solving the Randles-Cevcik equation for the diffusion coefficient.

**Table S1** Apparent lithium diffusion coefficients ( $D$ ) calculated from CV measurements (Fig. S2)

| Peak | $D$<br>[cm <sup>2</sup> s <sup>-1</sup> ] | Peak | $D$<br>[cm <sup>2</sup> s <sup>-1</sup> ] |
|------|-------------------------------------------|------|-------------------------------------------|
| a1   | 5.2x10 <sup>-11</sup>                     | b1   | 9.0x10 <sup>-11</sup>                     |
| a2   | 1.0x10 <sup>-10</sup>                     | b2   | 1.8x10 <sup>-10</sup>                     |
| a3   | 1.3x10 <sup>-10</sup>                     | b3   | 2.1x10 <sup>-10</sup>                     |
| a4   | 3.6x10 <sup>-11</sup>                     | b4   | 2.3x10 <sup>-11</sup>                     |

**Table S2** The used current densities and obtained energy densities, and - efficiencies of the LIB, SC and LIC shown in the Ragone like plot (Fig. 8). Similar current densities are marked with §, \$, and †

|     | Energy<br>[Wh kg <sup>-1</sup> ] | Power<br>[kW kg <sup>-1</sup> ] | Current<br>[A g <sup>-1</sup> ] | Current<br>[mA cm <sup>-2</sup> ] | Efficiency<br>[%] |
|-----|----------------------------------|---------------------------------|---------------------------------|-----------------------------------|-------------------|
| LIB | 228                              | 0.0742                          | 0.0198                          | 0.108                             | 78                |
|     | 197                              | 0.180                           | 0.0495                          | 0.270                             | 72                |
|     | 166                              | 0.348                           | 0.0989                          | 0.539                             | 65                |
|     | 103                              | 0.811                           | 0.248                           | 1.352                             | 48                |
|     | 38.0 <sup>§</sup>                | 1.50                            | 0.989                           | 5.39 <sup>§</sup>                 | 25 <sup>§</sup>   |
| LIC | 45.6 <sup>§</sup>                | 4.59                            | 2.07                            | 5.59 <sup>§</sup>                 | 74 <sup>§</sup>   |
|     | 41.5 <sup>\$</sup>               | 9.02                            | 4.13                            | 11.2 <sup>\$</sup>                | 71 <sup>\$</sup>  |
|     | 33.1 <sup>†</sup>                | 16.2                            | 8.26                            | 22.36 <sup>†</sup>                | 62 <sup>†</sup>   |
| SC  | 22.95 <sup>§</sup>               | 1.329                           | 0.950                           | 5 <sup>§</sup>                    | 90 <sup>§</sup>   |
|     | 20.99 <sup>\$</sup>              | 2.572                           | 1.90                            | 10 <sup>\$</sup>                  | 85 <sup>\$</sup>  |
|     | 17.81 <sup>†</sup>               | 4.788                           | 3.80                            | 20 <sup>†</sup>                   | 76 <sup>†</sup>   |
|     | 10.84                            | 9.54                            | 9.50                            | 50                                | 53                |
